# Supplementary material
Source: ML conference proceedings conference paper supplement (https://openreview.net/forum?id=6O8lh1jIwI)

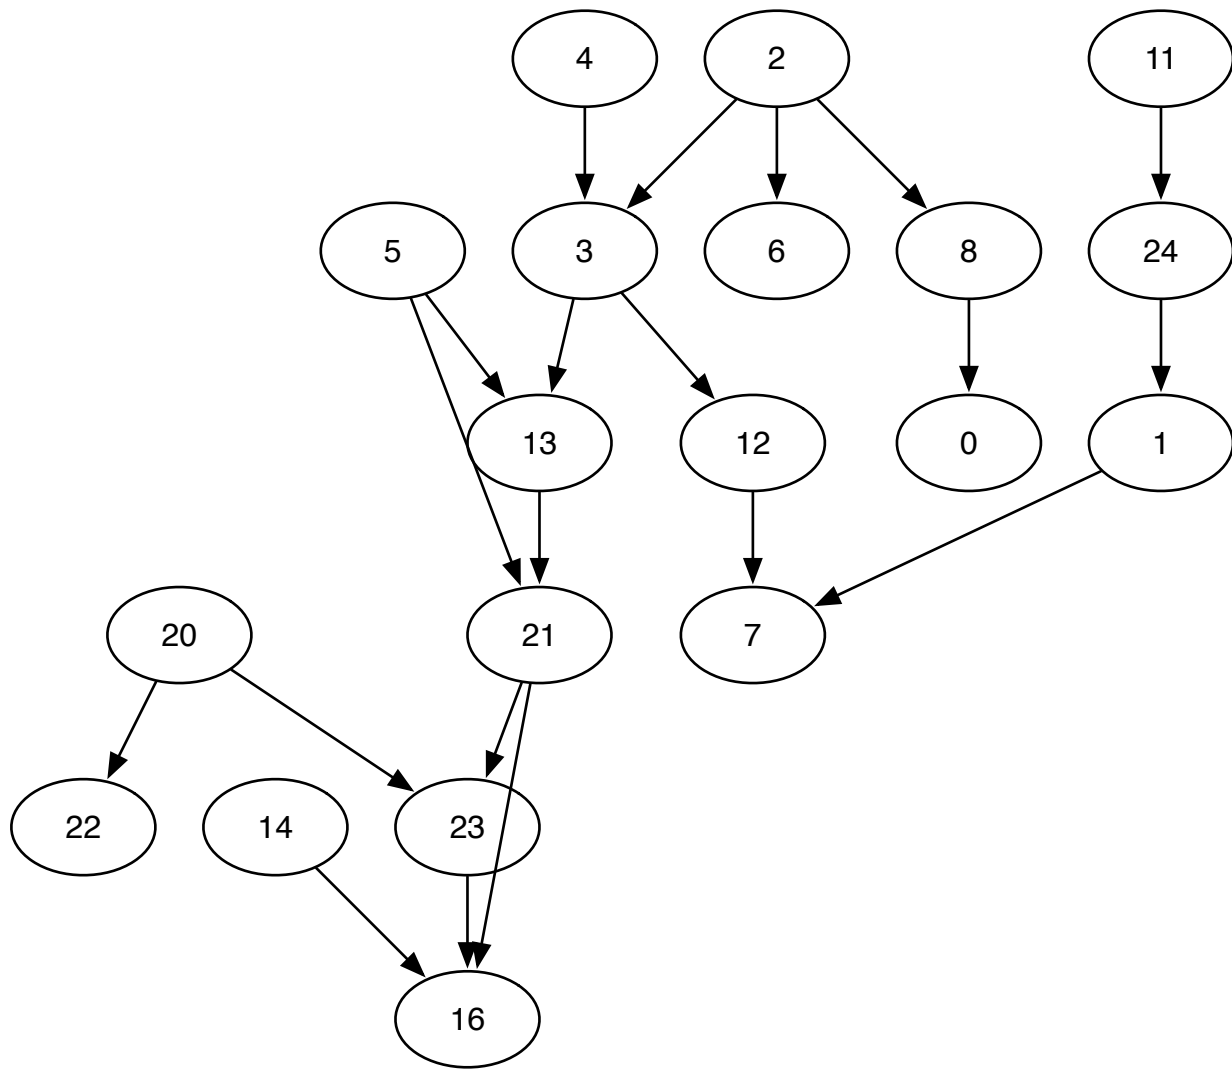

Supplement: supplementary_material [file attachment]

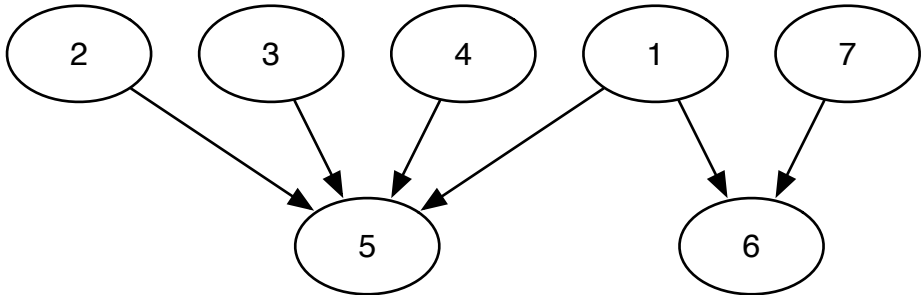

Supplement: supplementary_material [file attachment]

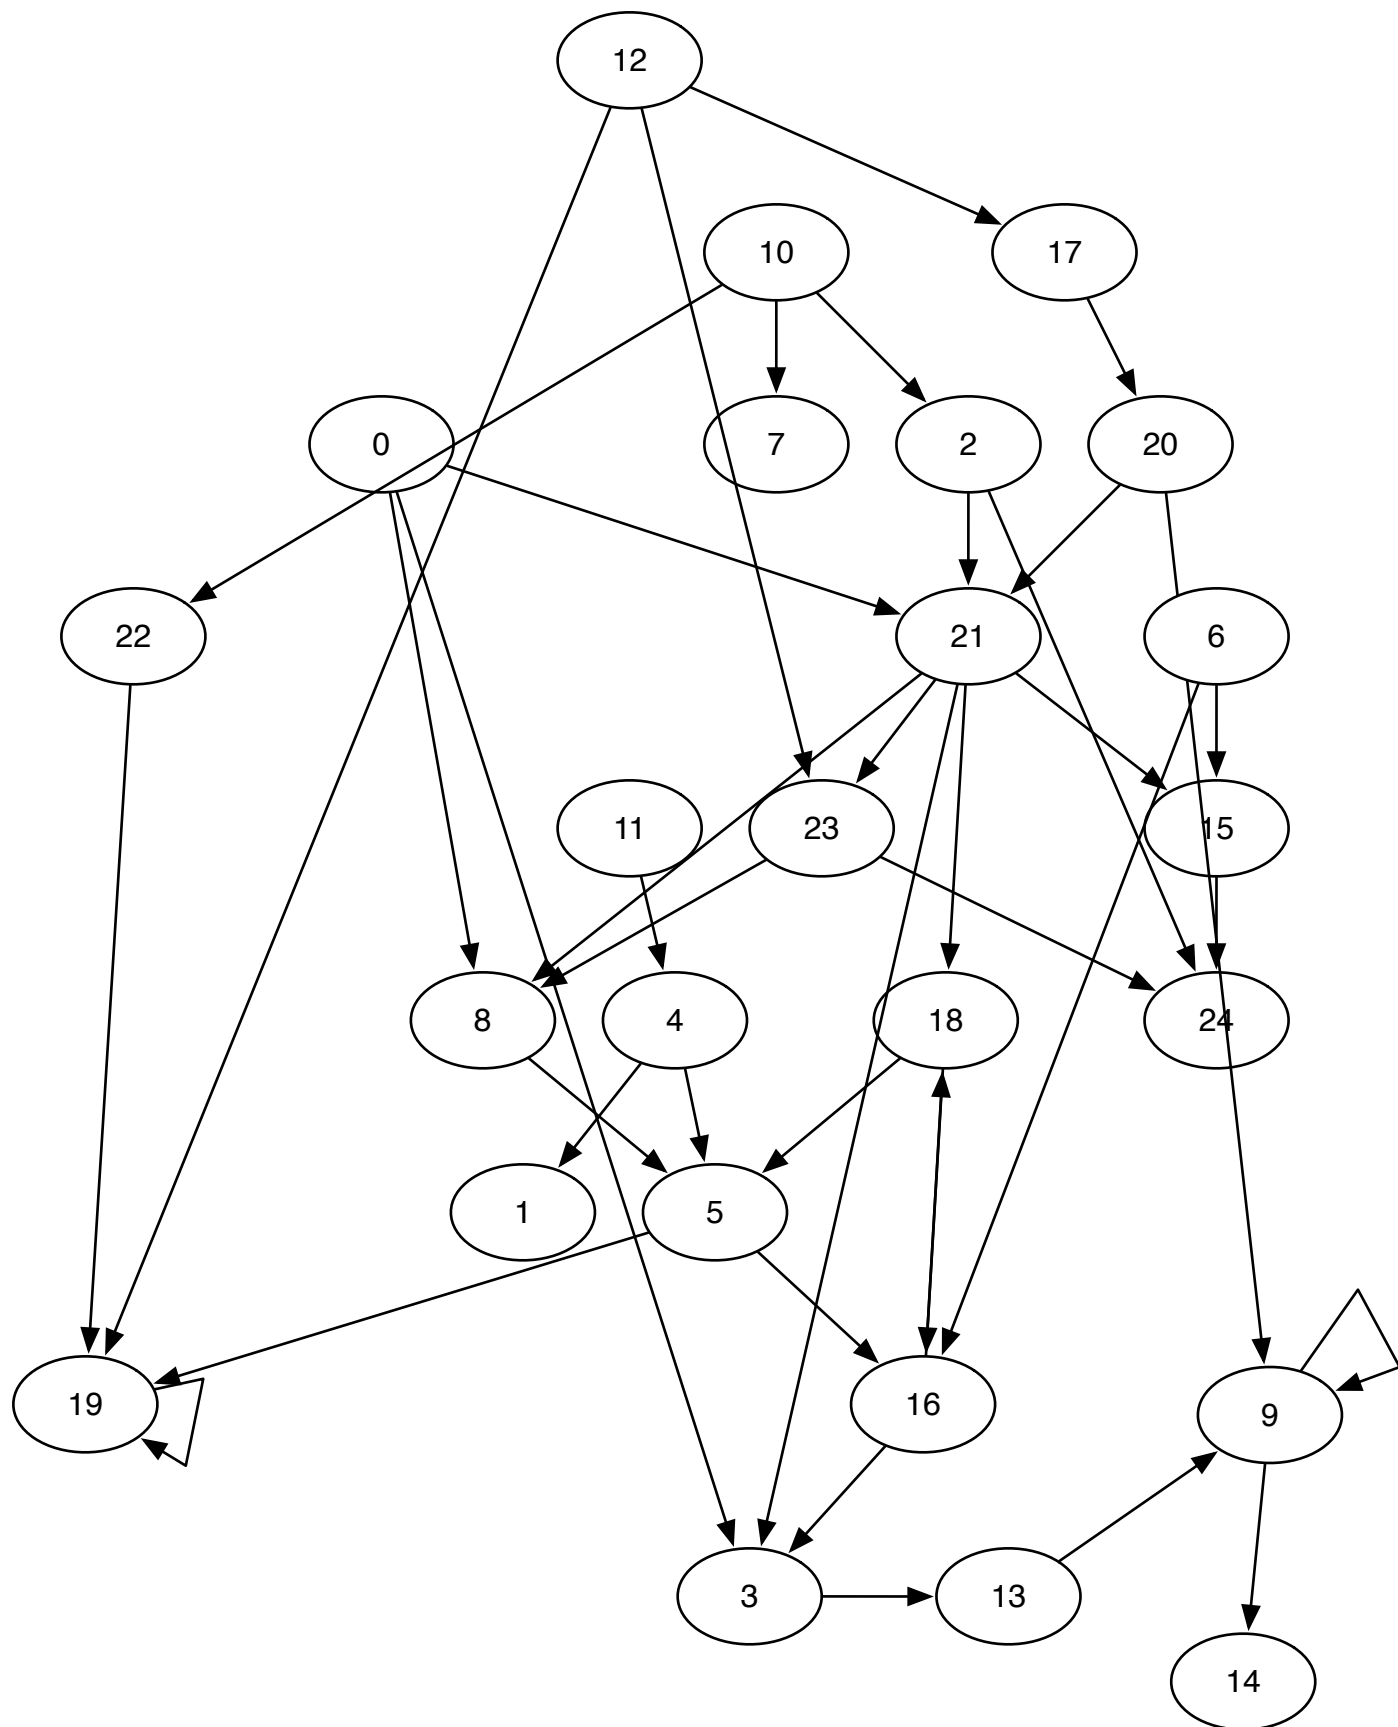

Supplement: supplementary_material [file attachment]

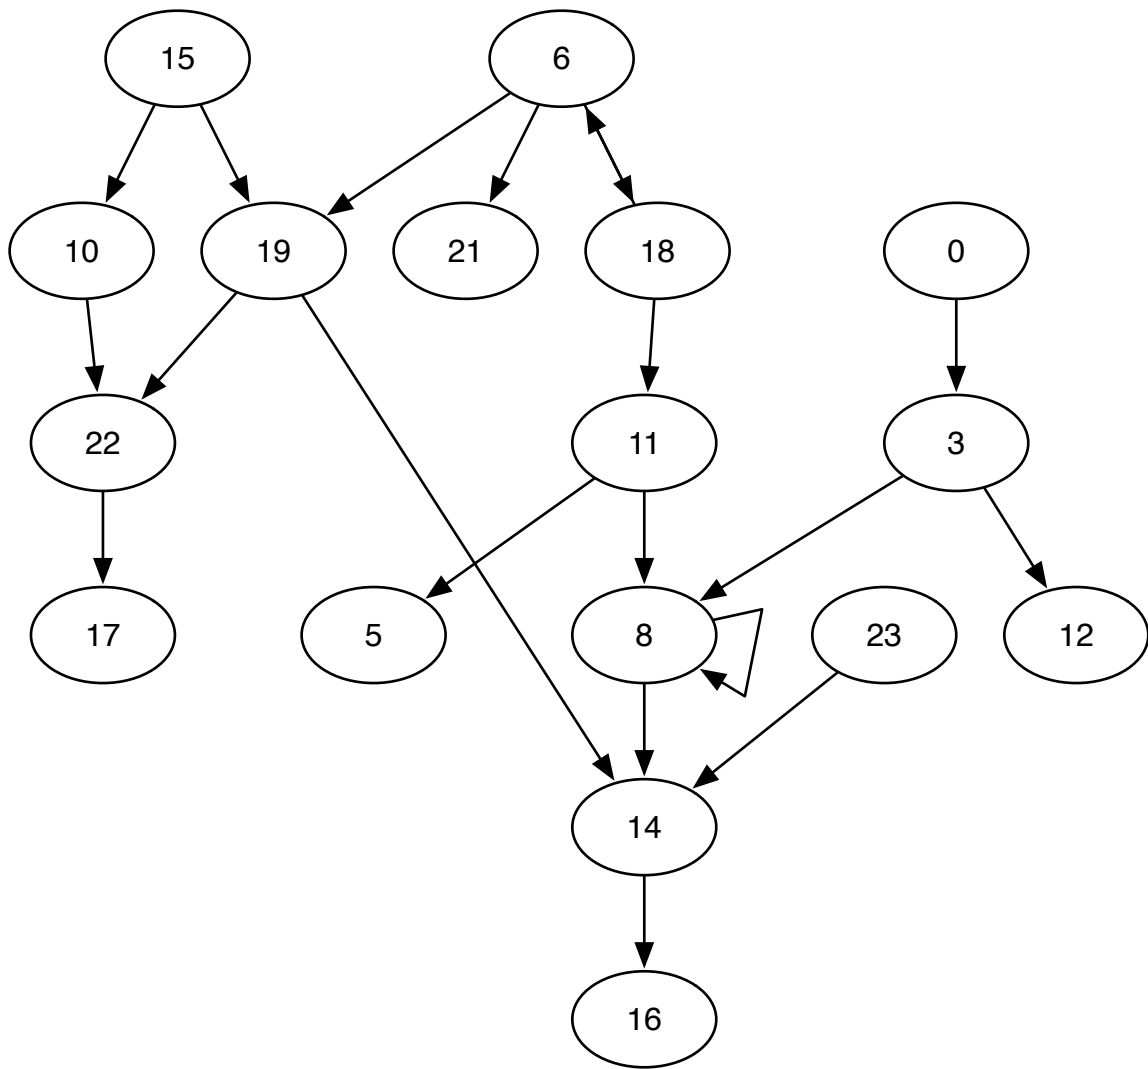

Supplement: supplementary_material [file attachment]

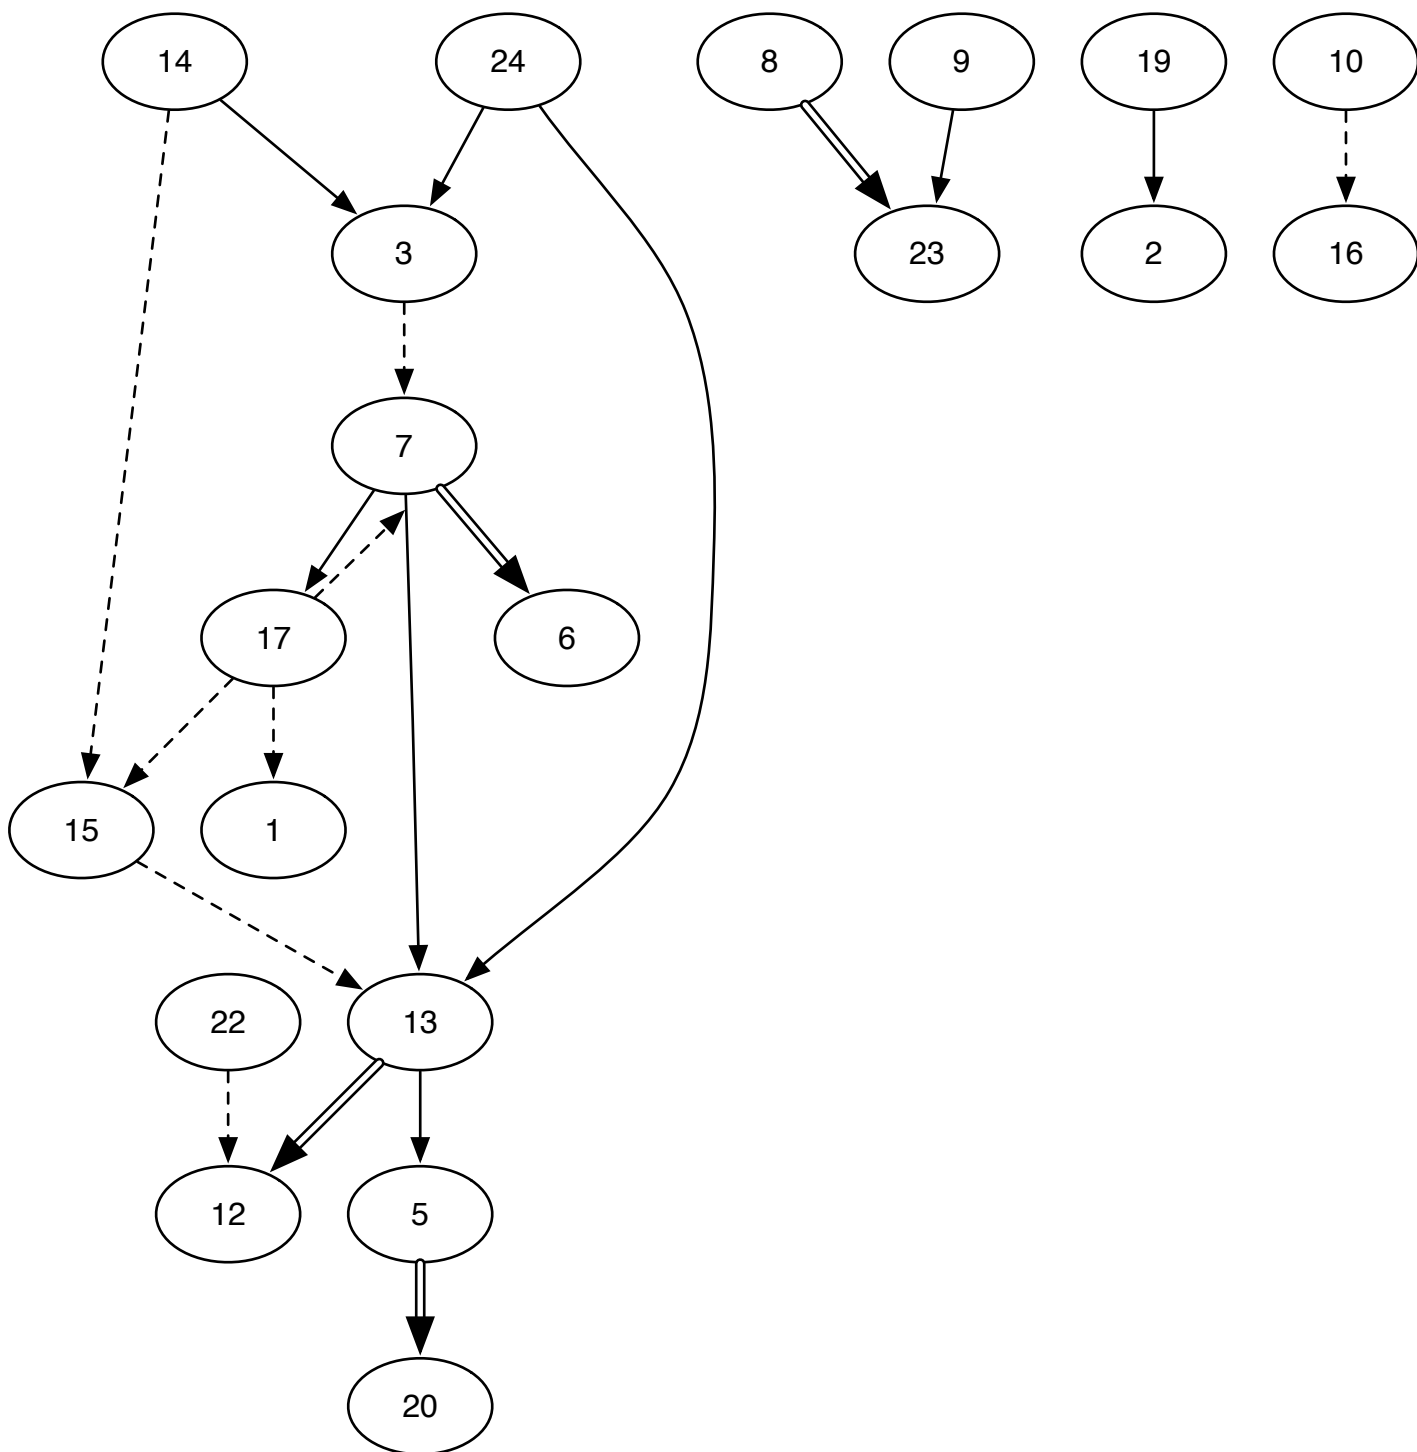

Supplement: supplementary_material [file attachment]

# Adjacency matrices

Ground Truth

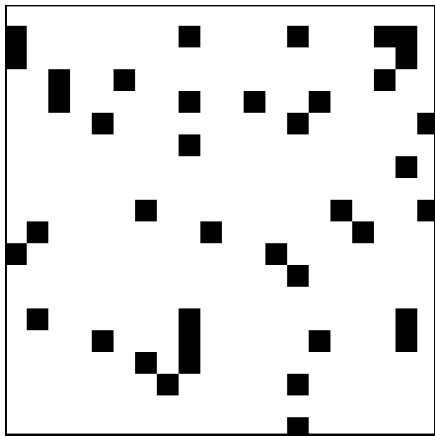

dagTFRC

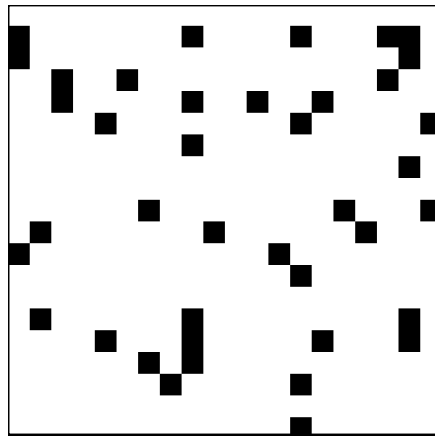

Supplement: supplementary_material [file attachment]

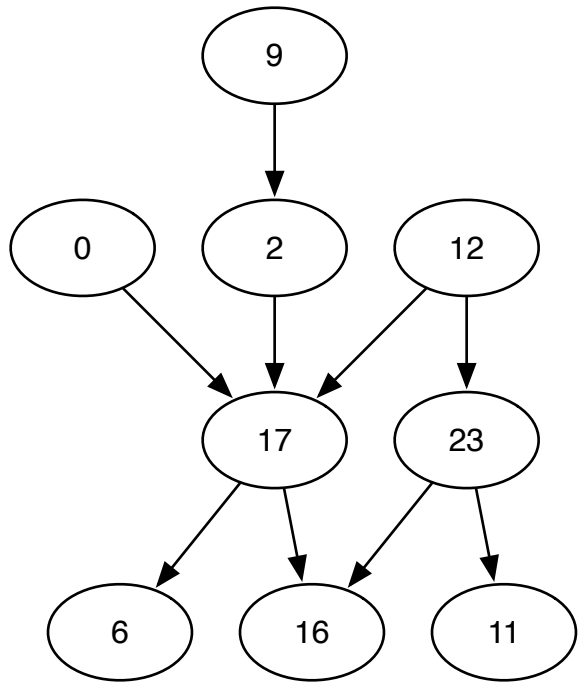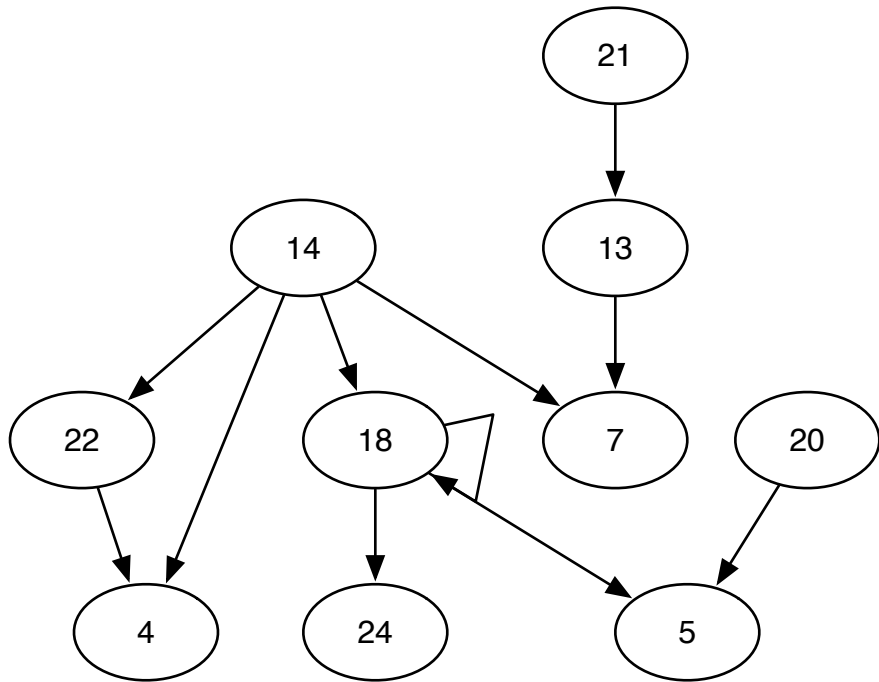

Supplement: supplementary_material [file attachment]

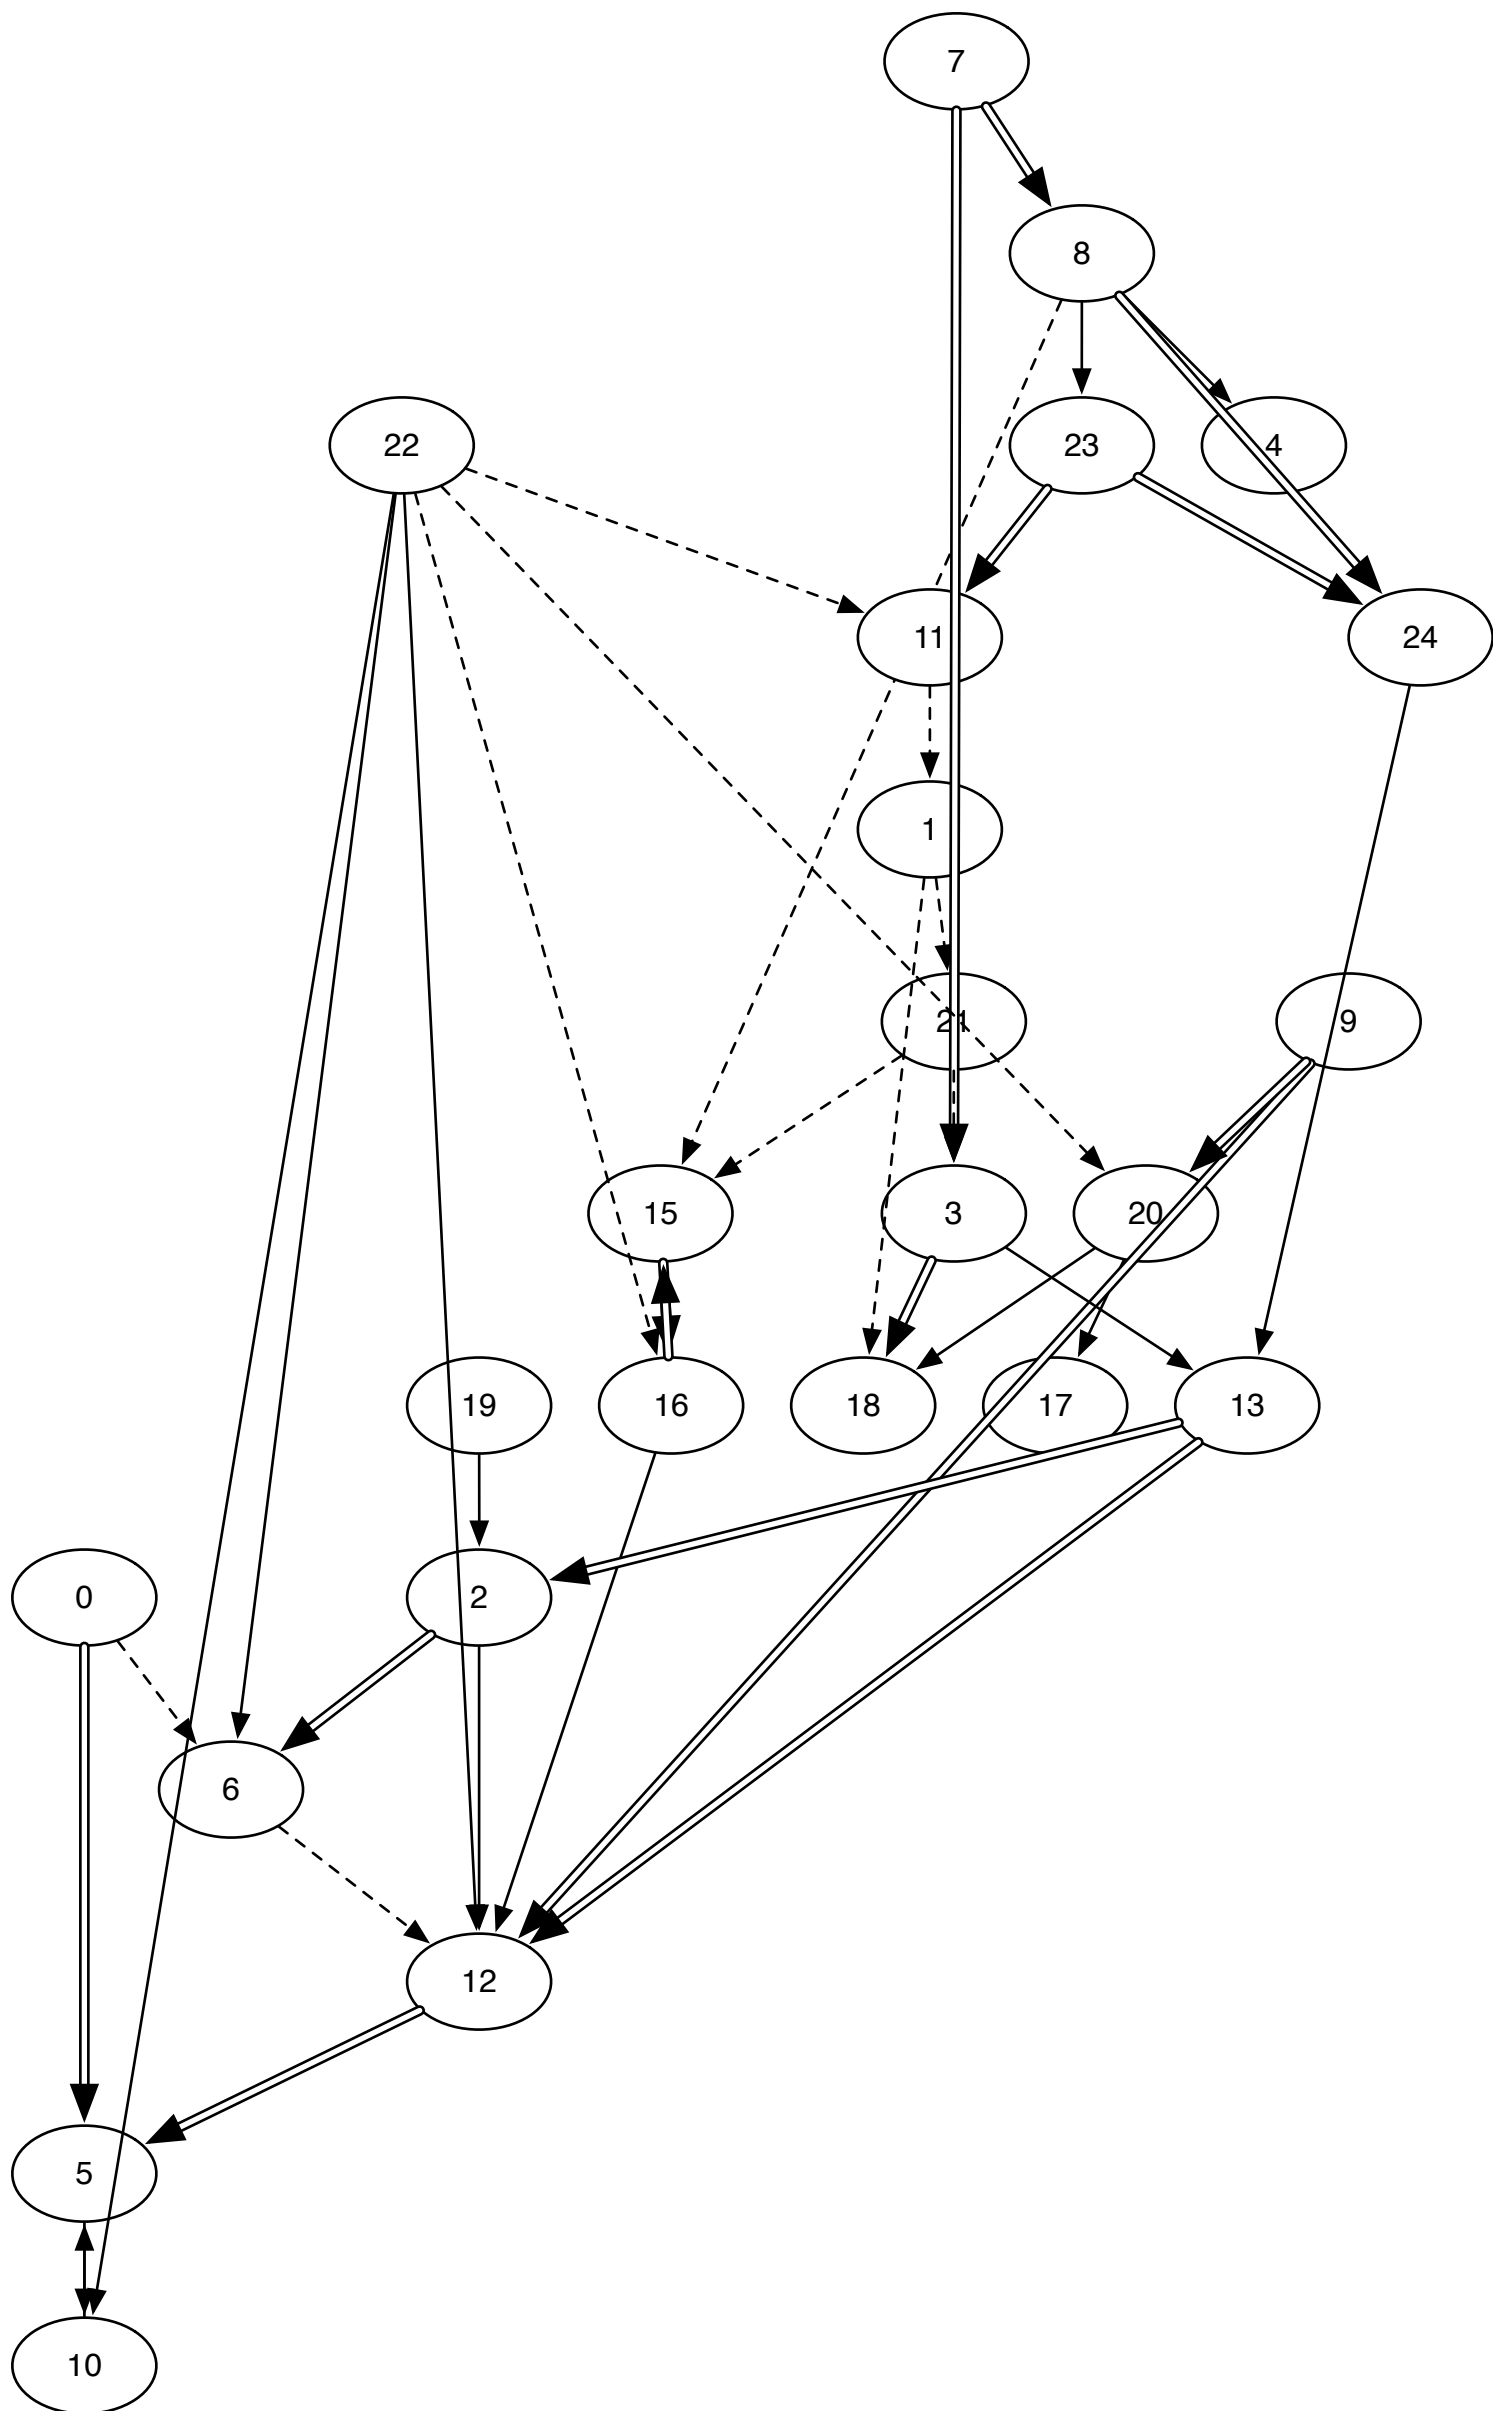

Supplement: supplementary_material [file attachment]

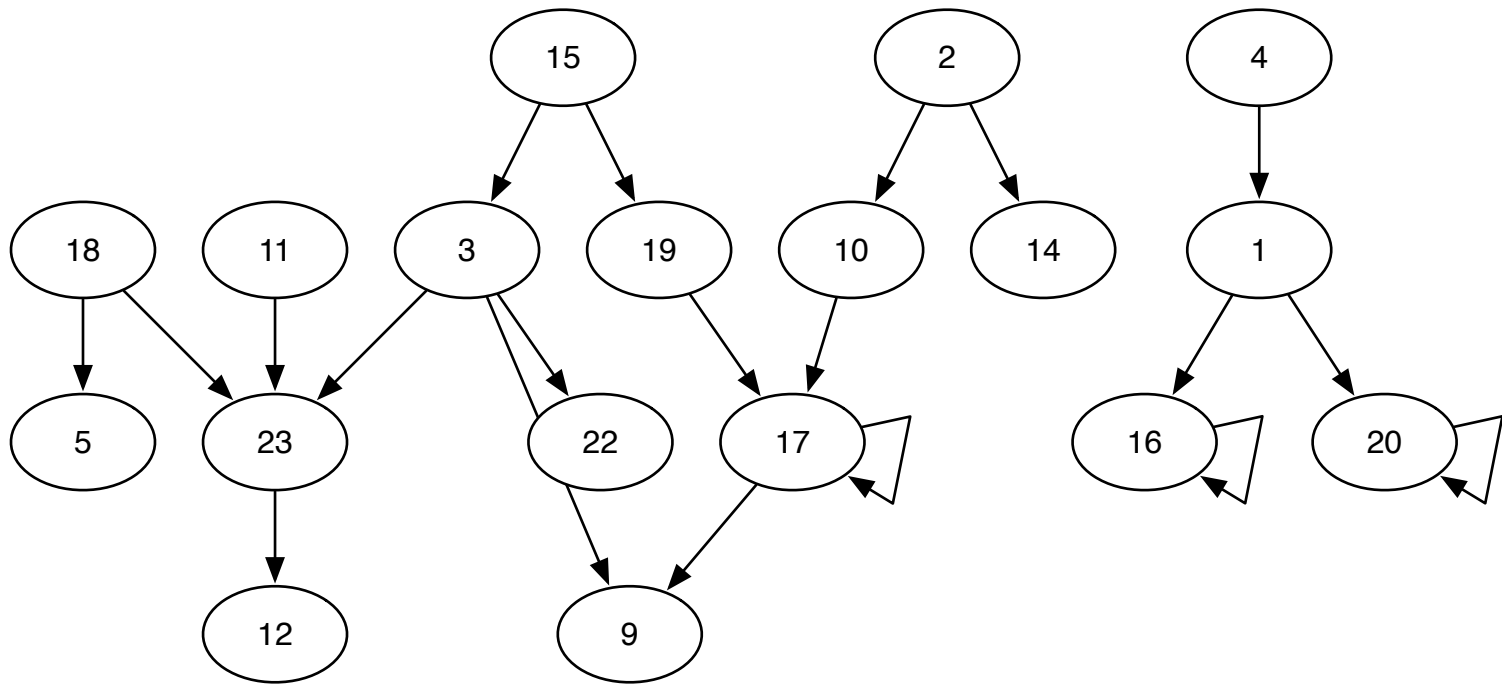

Supplement: supplementary_material [file attachment]

# Adjacency matrices

Ground Truth

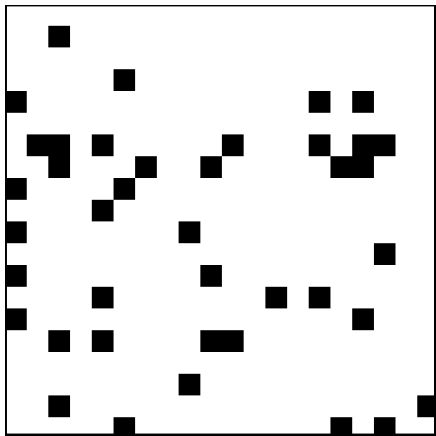

sparserc

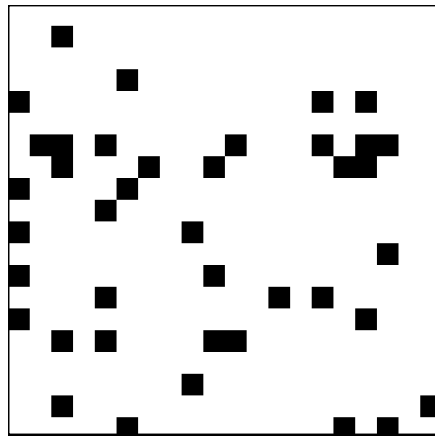

Supplement: supplementary_material [file attachment]

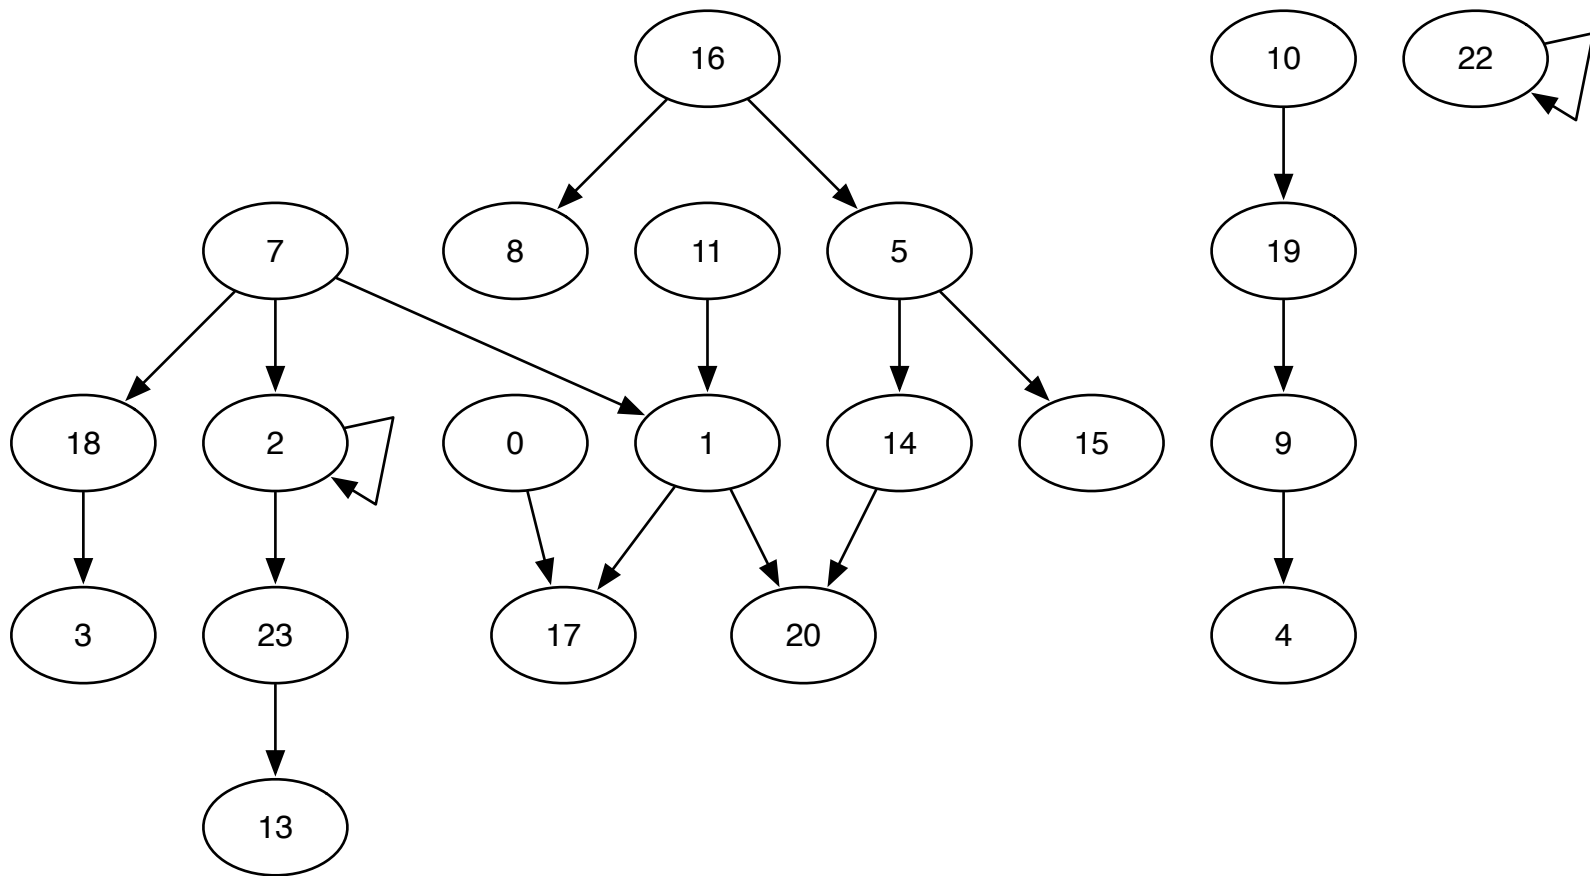

Supplement: supplementary_material [file attachment]
